# Supplementary material for: Selective electrooxidation of 5-hydroxymethylfurfural at low working potentials promoted by 3D hierarchical Cu(OH)2@Ni3Co1-layered double hydroxide architecture with oxygen vacancies
Source: Royal Society of Chemistry journal article supplement (doi:10.1039/d4ra00769g), 2024-01-01
Supplement: d4ra00769g1.pdf [file d4ra00769g1.pdf]

## Selective electrooxidation of 5-hydroxymethylfurfural at low working potentials promoted by 3D hierarchical Cu(OH)<sub>2</sub>@Ni<sub>3</sub>Co<sub>1</sub>-layered double hydroxide architecture with oxygen vacancies

Qian Wu <sup>a</sup>, Yanqi Xu <sup>a, b, c, \*</sup>, Cunjun Li <sup>a, b</sup>, Wenfeng Zhu <sup>a, b</sup>, Hai Wang <sup>c, d</sup>, Xinyu Wang <sup>e</sup>, Aimiao Qin <sup>a</sup>, Haiqing Qin <sup>f</sup>, and Linjiang Wang <sup>a, b, \*</sup>

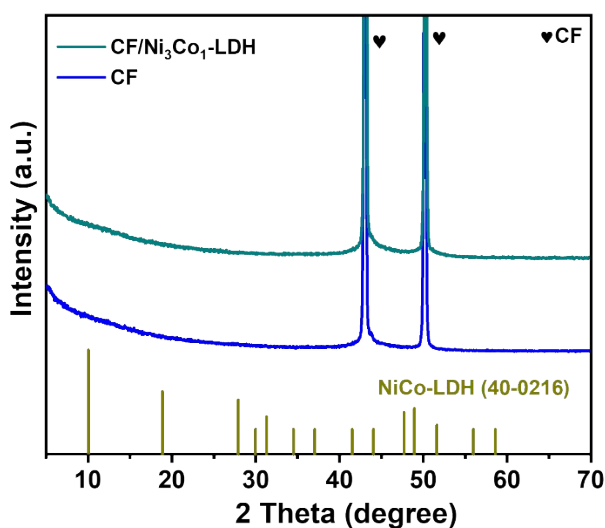

Fig. S1. XRD patterns of CF and CF/Ni<sub>3</sub>Co<sub>1</sub>-LDH.

<sup>a</sup> College of Materials Science and Engineering, Key Laboratory of New Processing Technology for Nonferrous Metal & Materials, Ministry of Education, Guilin University of Technology, Guilin 541004, China

<sup>b</sup> Collaborative Innovation Center for Exploration of Nonferrous Metal Deposits and Efficient Utilization of Resources, Guilin University of Technology, Guilin 541004, China

<sup>c</sup> Guangxi Key Laboratory of Nuclear Physics and Nuclear Technology, Guangxi Normal University, Guilin 541004, China

<sup>d</sup> College of Physics and Technology, Guangxi Normal University, Guilin 541004, China

<sup>e</sup> School of Materials and Energy, University of Electronic Science and Technology of China, Chengdu 611731, China

<sup>f</sup> Guangxi Key Laboratory of Superhard Material, National Engineering Research Center for Special Mineral Material, Guangxi Technology Innovation Center for Special Mineral Material, China Nonferrous Metal (Guilin) Geology and Mining Co., Ltd. Guilin 541004, China

\* Corresponding author: [xuyanqi@glut.edu.cn](mailto:xuyanqi@glut.edu.cn); [wlinjiang@163.com](mailto:wlinjiang@163.com)

Electronic Supplementary Information (ESI) available: [details of any supplementary information available should be included here]. See DOI: 10.1039/x0xx00000x

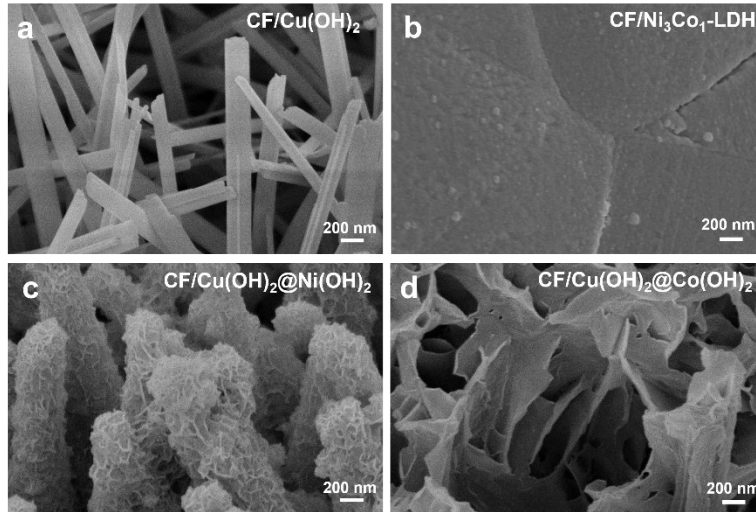

**Fig. S2.** SEM images of (a) CF/Cu(OH)<sub>2</sub>, (b) CF/Ni<sub>3</sub>Co<sub>1</sub>-LDH, (c) CF/Cu(OH)<sub>2</sub>@Ni(OH)<sub>2</sub>, and (d) CF/Cu(OH)<sub>2</sub>@Co(OH)<sub>2</sub>, respectively.

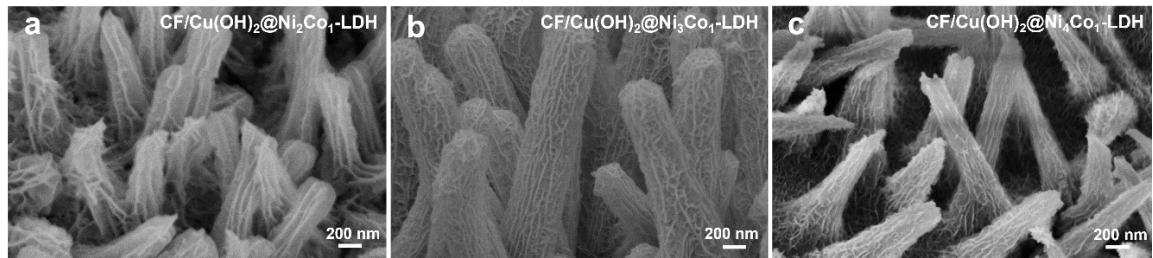

**Fig. S3.** SEM images of CF/Cu(OH)<sub>2</sub>@Ni<sub>x</sub>Co<sub>y</sub>-LDH (x/y = 2/1, 3/1, 4/1).

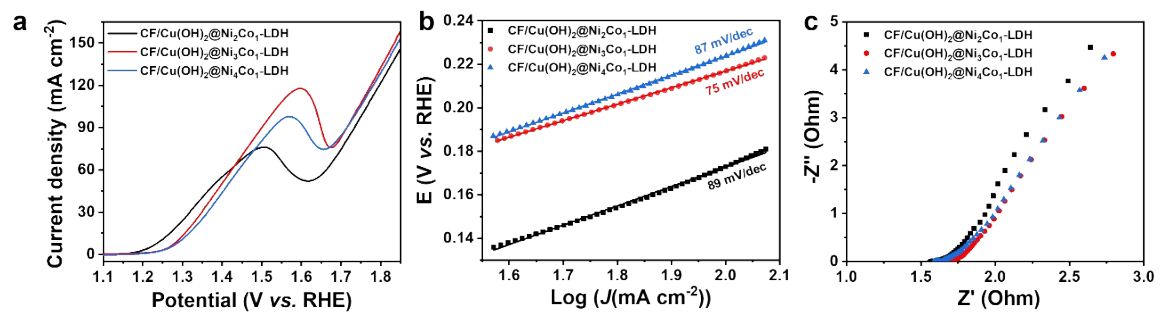

**Fig. S4.** (a) LSV curves measured a scan rate of 50 mV s<sup>-1</sup>, (b) Tafel, and (c) EIS spectra of CF/Cu(OH)<sub>2</sub>@Ni<sub>x</sub>Co<sub>y</sub>-LDH (x/y = 2/1, 3/1, 4/1) in 1.0 M KOH and 10 mM HMF solution.

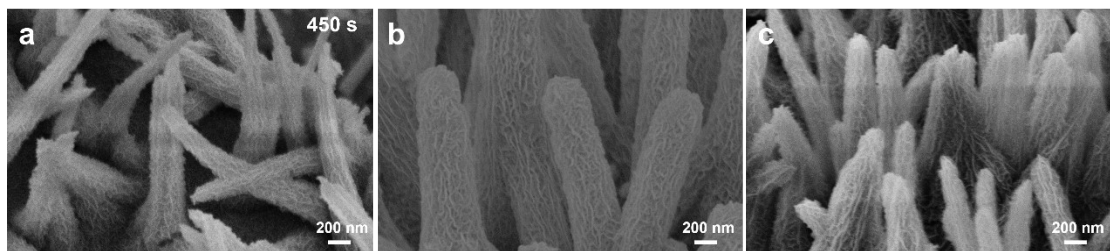

**Fig. S5.** The SEM images of CF/Cu(OH)<sub>2</sub>@Ni<sub>3</sub>Co<sub>1</sub>-LDH fabricated at different deposition time (t = 450, 600, 750 s).

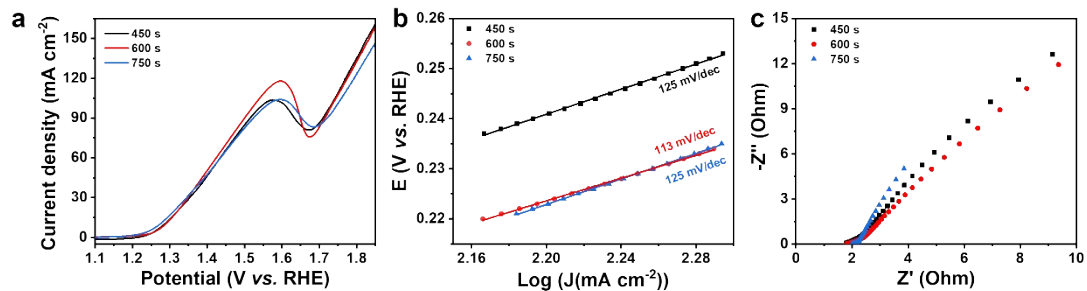

**Fig. S6.** (a) LSV curves measured at a scan rate of  $50 \text{ mV s}^{-1}$ , (b) Tafel, and (c) EIS spectra of  $\text{CF/Cu(OH)}_2\text{@Ni}_3\text{Co}_1\text{-LDH}$  fabricated at different deposition time ( $t = 450, 600, 750 \text{ s}$ ) in  $1.0 \text{ M KOH}$  and  $10 \text{ mM HMF}$  solution.

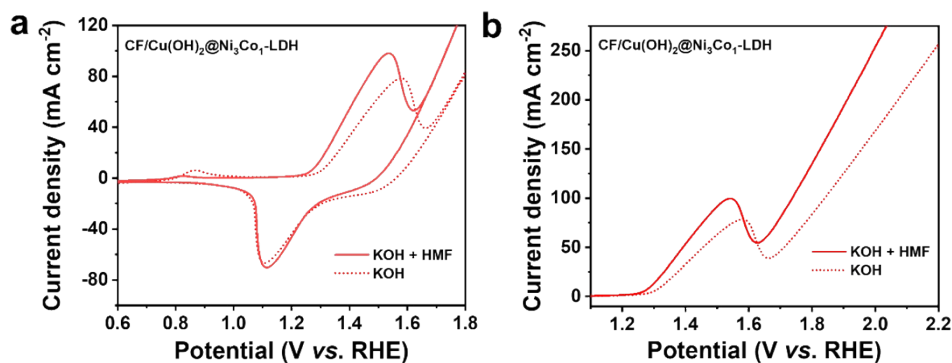

**Fig. S7.** (a) CV curves and (b) LSV curves of  $\text{CF/Cu(OH)}_2\text{@Ni}_3\text{Co}_1\text{-LDH}$  measured at a scan rate of  $50 \text{ mV s}^{-1}$  in  $1.0 \text{ M KOH}$  and  $10 \text{ mM HMF}$  solution.

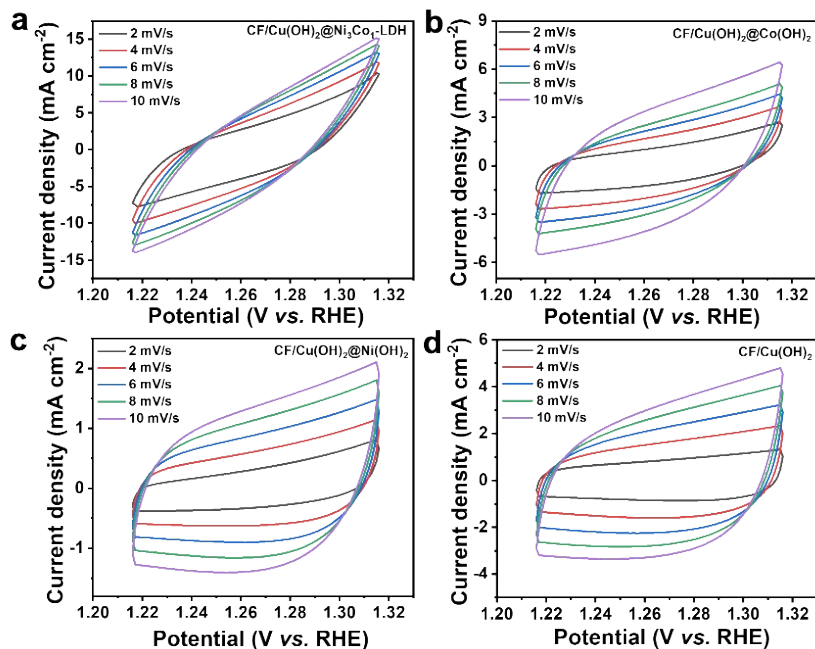

**Fig. S8.** The CV curves of the (a)  $\text{CF/Cu(OH)}_2\text{@Ni}_3\text{Co}_1\text{-LDH}$ , (b)  $\text{CF/Cu(OH)}_2\text{@Co(OH)}_2$ , (c)  $\text{CF/Cu(OH)}_2\text{@Ni(OH)}_2$  and (d)  $\text{CF/Cu(OH)}_2$  in  $1.0 \text{ M KOH}$  and  $10 \text{ mM HMF}$  solution at sweep rate of  $2, 4, 6, 8$  and  $10 \text{ mV}\cdot\text{s}^{-1}$ , respectively.

**Table S1.** Fitting impedance values of CF/Cu(OH)<sub>2</sub>, CF/Cu(OH)<sub>2</sub>@Ni<sub>3</sub>Co<sub>1</sub>-LDH, CF/Cu(OH)<sub>2</sub>@Ni(OH)<sub>2</sub>, and CF/Cu(OH)<sub>2</sub>@Co(OH)<sub>2</sub>, respectively.

| Sample                                                        | Rs (Ω)      | Rct (Ω)     |
|---------------------------------------------------------------|-------------|-------------|
| CF/Cu(OH) <sub>2</sub>                                        | 1.54        | 0.51        |
| <b>CF/Cu(OH)<sub>2</sub>@Ni<sub>3</sub>Co<sub>1</sub>-LDH</b> | <b>1.42</b> | <b>0.34</b> |
| CF/Cu(OH) <sub>2</sub> @Ni(OH) <sub>2</sub>                   | 1.64        | 0.48        |
| CF/Cu(OH) <sub>2</sub> @Co(OH) <sub>2</sub>                   | 1.76        | 0.49        |

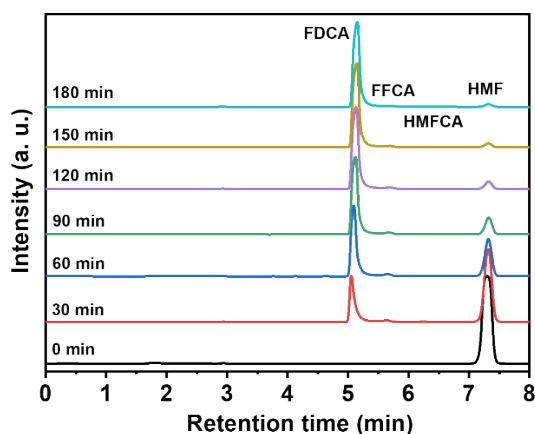

**Fig. S9.** The procedure of HMF electrooxidation over CF/Cu(OH)<sub>2</sub>@Ni<sub>3</sub>Co<sub>1</sub>-LDH from HPLC chromatograms spectra. Reaction conditions: 35 mL of 10 mM HMF, 25°C, onset potential 1.0 V vs. RHE, and reaction time 3 h.

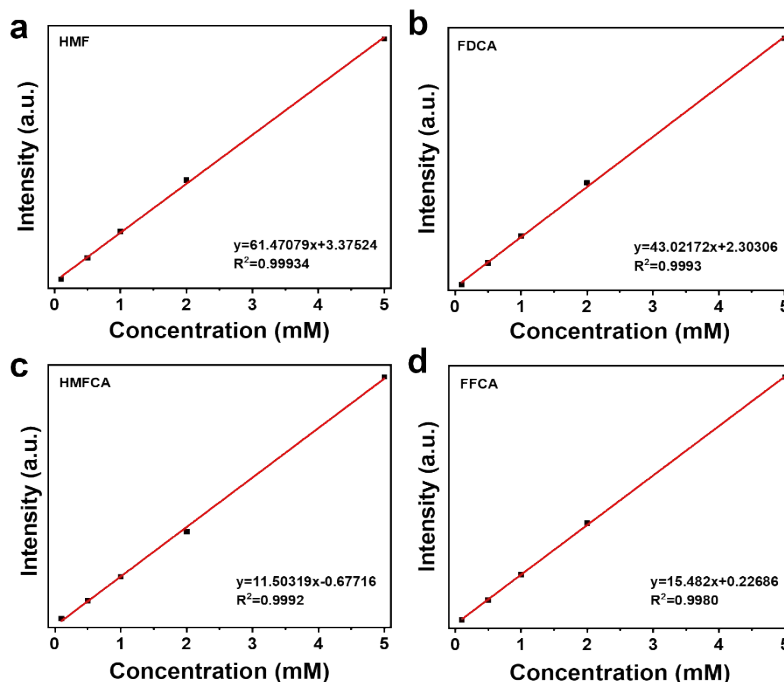

**Fig. S10.** Calibration curves of HMF, FDCA, HMFA, and FFCA standard samples.

**Table S2.** Comparison of electrocatalytic performance and recycled stability of the CF/Cu(OH)<sub>2</sub>@Ni<sub>3</sub>Co<sub>1</sub>-LDH with other reported catalysts toward HMF electrocatalytic oxidation in alkaline medium.

| Catalyst                                                     | Oxidation potential (vs. RHE) | Reaction time/Charge Passed | Cycles | FDCA Yield | FDCA FE | Ref.      |
|--------------------------------------------------------------|-------------------------------|-----------------------------|--------|------------|---------|-----------|
| CF/Cu(OH) <sub>2</sub> @Ni <sub>3</sub> Co <sub>1</sub> -LDH | 1.0 V (25 °C)                 | 3 h                         | 8      | 98.64%     | 86.5%   | This work |
| Cu <sub>x</sub> S-NiCo-LDH/CF                                | 1.34 V                        | 10 min/57.6 C               | 5      | ~99%       | ~99%    | 1         |
| NiCoFe-LDH                                                   | 1.52 V (60 °C)                | 1 h/55 °C                   | 10     | 84.90%     | 90%     | 2         |
| NiFe-LDH/CP                                                  | 1.23 V (60 °C)                | 1.5 h                       | 10     | 98%        | 99.4%   | 3         |
| NiVCo-LDH                                                    | 1.376 V                       | 50 min/57.89 C              | 10     | ~99%       | ~92%    | 4         |
| NiCoMn-LDHs/NF                                               | 1.50 V                        | 2.5 h                       | 4      | 91.7%      | 65%     | 5         |
| NiCo <sub>2</sub> O <sub>4</sub>                             | 1.50 V                        | 1 h/34.75 C                 | 3      | 90.8%      | 87.5%   | 6         |
| Ni <sub>x</sub> Se <sub>y</sub> -NiFe LDH@NF                 | 1.423 V                       | 116 C                       | 6      | ~97%       | ~96.7%  | 7         |
| CoO-CoSe <sub>2</sub>                                        | 1.43 V                        | 1 h                         | 6      | 99%        | 97.9%   | 8         |
| d-NiFe LDH/CP                                                | 1.48 V                        | 5 h                         | 10     | 96.8%      | 84.47%  | 9         |
| NiFe-LDH/CoCH/NF                                             | 1.58 V                        | 1.5 h                       | 5      | 98%        | 98%     | 10        |
| CoO <sub>x</sub> H <sub>y</sub> -MA/BH                       | 1.52 V                        | 5 h                         | /      | 98%        | 83%     | 11        |
| Ni <sub>3</sub> S <sub>2</sub> -MoS <sub>2</sub> /NF         | 1.61 V                        | 1 h                         | 6      | 98%        | 88%     | 12        |
| CuCo <sub>2</sub> O <sub>4</sub>                             | 1.45 V                        | 62.5 C                      | 6      | 93.70%     | 94%     | 13        |
| NiO-Co <sub>3</sub> O <sub>4</sub>                           | 1.28 V                        | 60 C                        | 6      | 98%        | 96%     | 14        |
| E-CoAl-LDH-NSA                                               | 1.52 V                        | 59.1 C                      | 7      | 99%        | 95%     | 15        |
| Ni <sub>3</sub> S <sub>2</sub> /NF                           | 1.423 V                       | 58 C                        | 5      | 98%        | 94%     | 16        |
| NiCoBDC-NF                                                   | 1.55 V                        | 4 h                         | 4      | 99%        | 78.8%   | 17        |

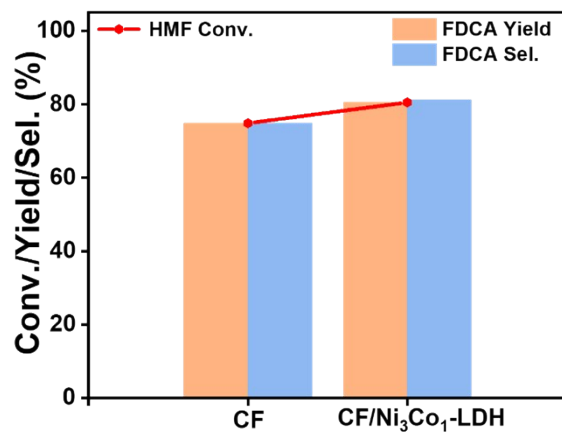

**Fig. S11.** The HMF conversion, FDCA yield and selectivity over CF and CF/@Ni<sub>3</sub>Co<sub>1</sub>-LDH. Reaction conditions: 35 mL of 10 mM HMF, 25 °C, onset potential 1.0 V vs. RHE, and reaction time 3 h.

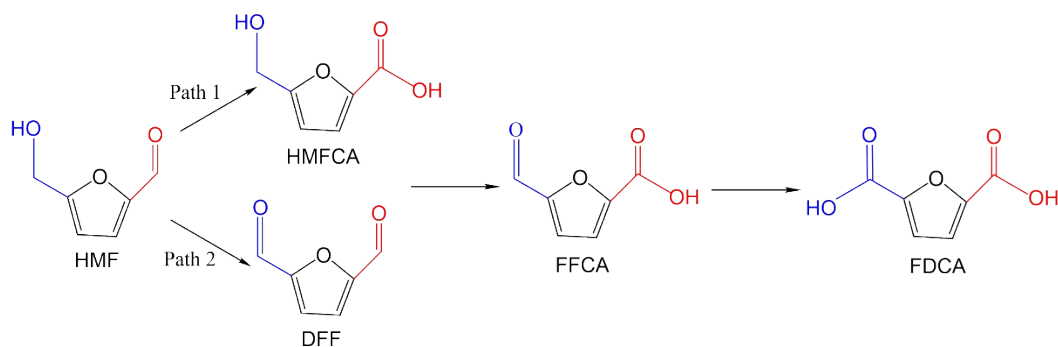

**Fig. S12.** Two possible oxidation routes from HMF to FDCA.

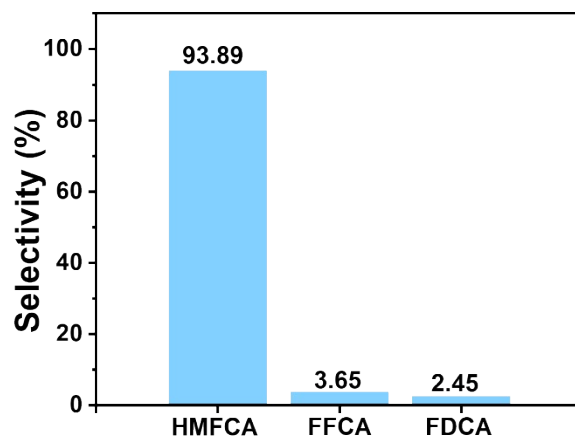

**Fig. S13.** The selectivity of FDCA, FFCA, and FDCA over CF/Cu(OH)<sub>2</sub>@Ni<sub>3</sub>Co<sub>1</sub>-LDH. Reaction conditions: 35 mL of 10 mM HMF, 25 °C, onset potential 0.2 V vs. RHE, and reaction time 3 h.

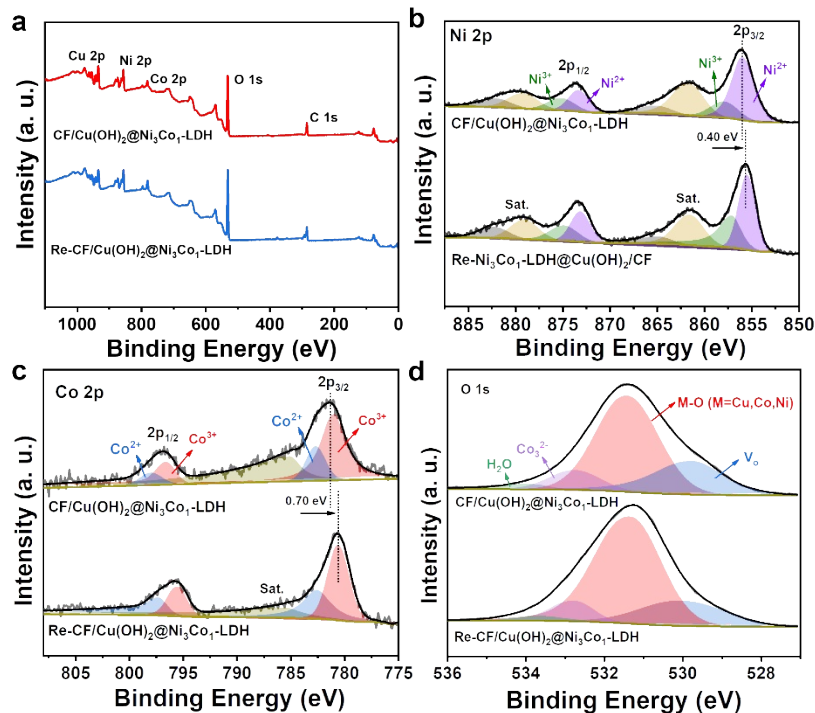

**Fig. S14.** (a) Survey spectrum, (b) Ni 2p, (c) Co 2p, and (d) O 1s spectra of CF/Cu(OH)<sub>2</sub>@Ni<sub>3</sub>Co<sub>1</sub>-LDH and Re-CF/Cu(OH)<sub>2</sub>@Ni<sub>3</sub>Co<sub>1</sub>-LDH.

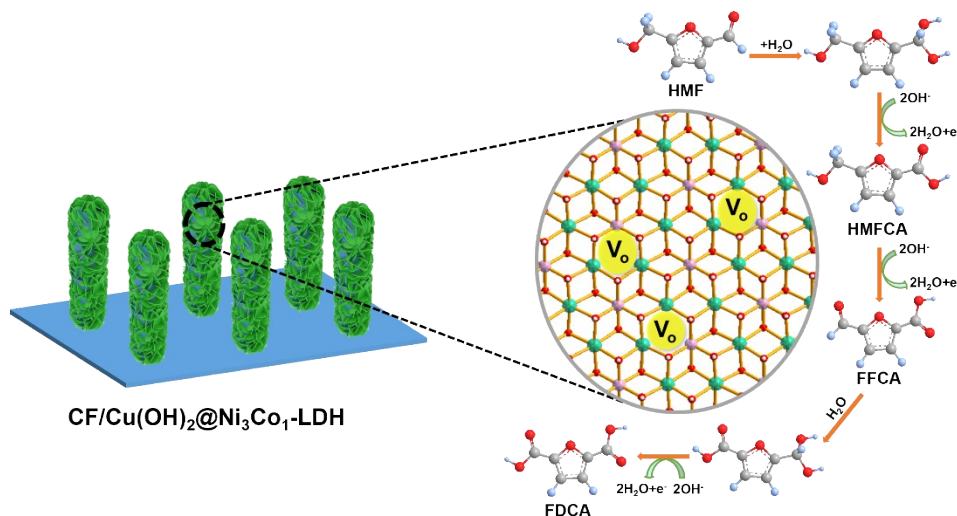

**Fig. S15.** The possible electrooxidation pathways of HMF to FDCA on CF/Cu(OH)<sub>2</sub>@Ni<sub>3</sub>Co<sub>1</sub>-LDH.

### Supplementary References

1. X. Deng, X. Kang, M. Li, K. Xiang, C. Wang, Z. Guo, J. Zhang, X.-Z. Fu and J.-L. Luo, *J. Mater. Chem. A*, 2020, **8**, 1138-1146.
2. M. Zhang, Y. Liu, B. Liu, Z. Chen, H. Xu and K. Yan, *ACS Catal.*, 2020, **10**, 5179-5189.
3. W.-J. Liu, L. Dang, Z. Xu, H.-Q. Yu, S. Jin and G. W. Huber, *ACS Catal.*, 2018, **8**, 5533-5541.
4. L. Gao, X. Wen, S. Liu, D. Qu, Y. Ma, J. Feng, Z. Zhong, H. Guan and L. Niu, *J. Mater. Chem. A*, 2022, **10**, 21135-21141.
5. B. Liu, S. Xu, M. Zhang, X. Li, D. Decarolis, Y. Liu, Y. Wang, E. K. Gibson, C. R. A. Catlow and K. Yan, *Green Chem.*, 2021, **23**, 4034-4043.
6. M. J. Kang, H. Park, J. Jegal, S. Y. Hwang, Y. S. Kang and H. G. Cha, *Appl. Catal. B*, 2019, **242**, 85-91.
7. Y. Zhong, R.-Q. Ren, J.-B. Wang, Y.-Y. Peng, Q. Li and Y.-M. Fan, *Catal. Sci. Technol.*, 2022, **12**, 201-211.
8. X. Huang, J. Song, M. Hua, Z. Xie, S. Liu, T. Wu, G. Yang and B. Han, *Green Chem.*, 2020, **22**, 843-849.

9. Y.-F. Qi, K.-Y. Wang, Y. Sun, J. Wang and C. Wang, *ACS Sustain. Chem. Eng.*, 2022, **10**, 645-654.
10. L. Dhanasmoro and O. L. Li, *New J. Chem.*, 2023, **47**, 14282-14288.
11. R. Zhong, P. Wu, Q. Wang, X. Zhang, L. Du, Y. Liu, H. Yang, M. Gu, Z. C. Zhang, L. Huang and S. Ye, *Green Chem.*, 2023, **25**, 4674-4684.
12. R. Zhang, F. Gao, C. Yang, Y. Bian, G. Wang, K. Xue, J. Zhang, C. Wang and X. Gao, *Materials Today Nano*, 2023, **23**, 100373.
13. Y. Lu, C.-L. Dong, Y.-C. Huang, Y. Zou, Z. Liu, Y. Liu, Y. Li, N. He, J. Shi and S. Wang, *Angew. Chem. Int. Ed.*, 2020, **59**, 19215-19221.
14. Y. Lu, C.-L. Dong, Y.-C. Huang, Y. Zou, Y. Liu, Y. Li, N. Zhang, W. Chen, L. Zhou, H. Lin and S. Wang, *Sci China Chem*, 2020, **63**, 980-986.
15. Y. Song, Z. Li, K. Fan, Z. Ren, W. Xie, Y. Yang, M. Shao and M. Wei, *Appl. Catal. B*, 2021, **299**, 120669.
16. B. You, X. Liu, N. Jiang and Y. Sun, *J. Am. Chem. Soc.*, 2016, **138**, 13639-13646.
17. M. Cai, Y. Zhang, Y. Zhao, Q. Liu, Y. Li and G. Li, *J. Mater. Chem. A*, 2020, **8**, 20386-20392.
